# Supplementary material for: Structural and compositional mismatch between captive and wild Atlantic salmon (Salmo salar) parrs’ gut microbiota highlights the relevance of integrating molecular ecology for management and conservation methods
Source: PubMed Central journal article supplement (PMC6183451; doi:10.1111/eva.12658), 2018-06-30
Supplement: EVA-11-1671-s001.pdf [file EVA-11-1671-s001.pdf]

## 1 Supporting informations

2 **Tab. 1.** Used reagents for PCR1 and PCR2 and their respective quantity in  $\mu\text{L}$  for processing one  
3 sample.

| Reagent                             | Quantity ( $\mu\text{L}$ ) |      |
|-------------------------------------|----------------------------|------|
|                                     | PCR 1                      | PCR2 |
| Q5 Buffer                           | 10,0                       | 10,0 |
| dNTPs                               | 1,00                       | 1,00 |
| 803r-Br                             | 2,50                       | -    |
| 347f-Br                             | 2,50                       | -    |
| Forward Primer (predetermined)      | -                          | 1,00 |
| Reverse Primer (markers)            | -                          | 1,00 |
| «High GC enhancer»                  | 10,0                       | 10,0 |
| DNA                                 | 3,00                       | 2,00 |
| Q5 Polymerase (New England Biolabs) | 1,00                       | 1,00 |
| Sterile water                       | 20,0                       | 24,0 |

4

5 **Tab. 2.** DNA amplification conditions for PCR1 and PCR2. The « Denaturation », « Hybridation » and  
6 « Elongation » steps were performed 35 times for PCR1 and 12 times for PCR2.

| Step                 | Temperature ( $^{\circ}\text{C}$ ) | Duration |
|----------------------|------------------------------------|----------|
| Initial Denaturation | 98.0                               | 2 min.   |
| Denaturation         | 98.0                               | 10 sec.  |
| Hybridation          | 60.0                               | 30 sec.  |
| Elongation           | 72.0                               | 30 sec.  |
| Final Elongation     | 72.0                               | 10 min.  |

7

8 **Tab. 3.** Alpha diversity indexes calculated using Shannon and Chao1 indexes for each environment.

| Alpha diversity indexes |         |       |        |
|-------------------------|---------|-------|--------|
| Environment             | Shannon | Chao1 | Pielou |
| Hatchery water          | 3.56    | 401   | 0.613  |
| Malbaie River           | 3.25    | 322   | 0.629  |
| Rimouski River          | 4.23    | 430   | 0.646  |
| Malbaie Captive         | 3.91    | 572   | 0.582  |
| Rimouski Captive        | 4.03    | 109   | 0.369  |
| Malbaie Wild            | 2.12    | 583   | 0.609  |
| Rimouski Wild           | 1.17    | 69    | 0.219  |

9

10

11

12

13

14

15

16

17

18

19 **Tab. 4** : Spearman correlation values of every samples interactions over 0.3.

| Sample1 | Sample2 | Spearman correlation value | Sample1 | Sample2 | Spearman correlation value |
|---------|---------|----------------------------|---------|---------|----------------------------|
| MCP2    | MCP1    | 0.776727915                | RCP4    | MCP7    | 0.579445541                |
| MCP3    | MCP1    | 0.736366868                | RCP5    | MCP7    | 0.381068438                |
| MCP4    | MCP1    | 0.775909662                | RCP6    | MCP7    | 0.426821709                |
| MCP5    | MCP1    | 0.704556167                | RCP7    | MCP7    | 0.354970843                |
| MCP7    | MCP1    | 0.431953102                | RCP8    | MCP7    | 0.353553265                |
| MCP8    | MCP1    | 0.388078451                | RWP10   | MCP7    | 0.301009506                |
| MCP9    | MCP1    | 0.651246965                | MCP9    | MCP8    | 0.67005378                 |
| RCP1    | MCP1    | 0.657814682                | RCP1    | MCP8    | 0.321904868                |
| RCP10   | MCP1    | 0.713101864                | RCP10   | MCP8    | 0.355427682                |
| RCP2    | MCP1    | 0.52373004                 | RCP2    | MCP8    | 0.325781703                |
| RCP4    | MCP1    | 0.587184966                | RCP4    | MCP8    | 0.494025916                |
| RCP5    | MCP1    | 0.694195151                | RCP5    | MCP8    | 0.342632771                |
| RCP6    | MCP1    | 0.715943098                | RCP6    | MCP8    | 0.365696877                |
| RCP7    | MCP1    | 0.545648456                | RCP8    | MCP8    | 0.310646147                |
| RCP8    | MCP1    | 0.688752949                | RCP1    | MCP9    | 0.582924426                |
| MCP3    | MCP2    | 0.825522363                | RCP10   | MCP9    | 0.629799366                |
| MCP4    | MCP2    | 0.849120796                | RCP2    | MCP9    | 0.48665604                 |
| MCP5    | MCP2    | 0.788360953                | RCP4    | MCP9    | 0.650752306                |
| MCP7    | MCP2    | 0.438159555                | RCP5    | MCP9    | 0.612640858                |
| MCP8    | MCP2    | 0.379061043                | RCP6    | MCP9    | 0.648674071                |
| MCP9    | MCP2    | 0.729747891                | RCP7    | MCP9    | 0.4303042                  |
| RCP1    | MCP2    | 0.684093237                | RCP8    | MCP9    | 0.619631648                |
| RCP10   | MCP2    | 0.774275661                | MWP19   | MWP13   | 0.462023258                |
| RCP2    | MCP2    | 0.556477547                | MWP5    | MWP13   | 0.410182089                |
| RCP4    | MCP2    | 0.596498847                | MWP6    | MWP13   | 0.443722099                |
| RCP5    | MCP2    | 0.73960495                 | MWP8    | MWP13   | 0.374030918                |
| RCP6    | MCP2    | 0.796154201                | MWP5    | MWP18   | 0.406838357                |
| RCP7    | MCP2    | 0.537454367                | MWP6    | MWP18   | 0.372329593                |
| RCP8    | MCP2    | 0.748993635                | MWP6    | MWP5    | 0.804266512                |
| MCP4    | MCP3    | 0.86482209                 | MWP8    | MWP5    | 0.416382849                |
| MCP5    | MCP3    | 0.763691425                | MWP8    | MWP6    | 0.463706166                |
| MCP7    | MCP3    | 0.425015688                | RCP10   | RCP1    | 0.739441514                |
| MCP8    | MCP3    | 0.373106271                | RCP2    | RCP1    | 0.610296488                |
| MCP9    | MCP3    | 0.702676535                | RCP4    | RCP1    | 0.627023101                |
| RCP1    | MCP3    | 0.726239443                | RCP5    | RCP1    | 0.690419495                |
| RCP10   | MCP3    | 0.794598341                | RCP6    | RCP1    | 0.715766132                |
| RCP2    | MCP3    | 0.543984294                | RCP7    | RCP1    | 0.459963441                |
| RCP4    | MCP3    | 0.600866735                | RCP8    | RCP1    | 0.714045584                |
| RCP5    | MCP3    | 0.734427035                | RCP2    | RCP10   | 0.561961114                |
| RCP6    | MCP3    | 0.765117586                | RCP4    | RCP10   | 0.612892985                |
| RCP7    | MCP3    | 0.495664239                | RCP5    | RCP10   | 0.731497705                |
| RCP8    | MCP3    | 0.751027405                | RCP6    | RCP10   | 0.798957586                |
| MCP5    | MCP4    | 0.761723578                | RCP7    | RCP10   | 0.515829563                |
| MCP7    | MCP4    | 0.436742604                | RCP8    | RCP10   | 0.782362044                |
| MCP8    | MCP4    | 0.417781413                | RCP4    | RCP2    | 0.539055586                |

|       |      |             |       |       |             |
|-------|------|-------------|-------|-------|-------------|
| MCP9  | MCP4 | 0.720632732 | RCP5  | RCP2  | 0.610953331 |
| RCP1  | MCP4 | 0.739521921 | RCP6  | RCP2  | 0.622983515 |
| RCP10 | MCP4 | 0.829283893 | RCP7  | RCP2  | 0.539431691 |
| RCP2  | MCP4 | 0.545181036 | RCP8  | RCP2  | 0.605473459 |
| RCP4  | MCP4 | 0.617342174 | RCP5  | RCP4  | 0.596200466 |
| RCP5  | MCP4 | 0.763753295 | RCP6  | RCP4  | 0.616751611 |
| RCP6  | MCP4 | 0.806639254 | RCP7  | RCP4  | 0.370275587 |
| RCP7  | MCP4 | 0.482407481 | RCP8  | RCP4  | 0.599891067 |
| RCP8  | MCP4 | 0.766966879 | RCP6  | RCP5  | 0.752898634 |
| MCP7  | MCP5 | 0.454329908 | RCP7  | RCP5  | 0.544891954 |
| MCP8  | MCP5 | 0.352232069 | RCP8  | RCP5  | 0.709425032 |
| MCP9  | MCP5 | 0.666088462 | RCP7  | RCP6  | 0.538466036 |
| RCP1  | MCP5 | 0.655108988 | RCP8  | RCP6  | 0.756495953 |
| RCP10 | MCP5 | 0.727000415 | RCP8  | RCP7  | 0.551578343 |
| RCP2  | MCP5 | 0.546182096 | RWP15 | RWP10 | 0.743631125 |
| RCP4  | MCP5 | 0.564081609 | RWP17 | RWP10 | 0.738391817 |
| RCP5  | MCP5 | 0.708690822 | RWP6  | RWP10 | 0.897734463 |
| RCP6  | MCP5 | 0.710317016 | RWP9  | RWP10 | 0.749299645 |
| RCP7  | MCP5 | 0.495533675 | RWP17 | RWP15 | 0.791844666 |
| RCP8  | MCP5 | 0.70558399  | RWP6  | RWP15 | 0.800657392 |
| MCP8  | MCP7 | 0.637044132 | RWP9  | RWP15 | 0.835136831 |
| MCP9  | MCP7 | 0.620754838 | RWP6  | RWP17 | 0.756336451 |
| RCP10 | MCP7 | 0.407645047 | RWP9  | RWP17 | 0.798399389 |
| RCP2  | MCP7 | 0.348198891 | RWP9  | RWP6  | 0.807845056 |
| RCP1  | MCP7 | 0.373283446 |       |       |             |

20

21

22

23

24

25

26

27

28

29

30

31

32

33

34

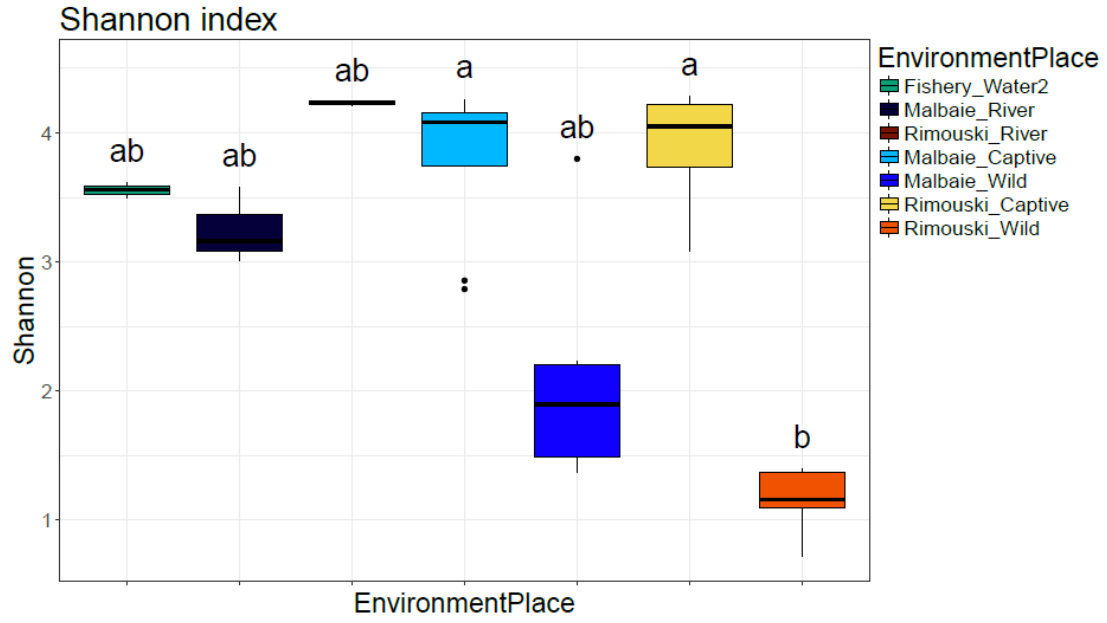

35

36 **Fig. 1** Alpha diversity of environment water and gut microbiota represented with Shannon diversity  
37 index.

38

39

40

41

42

43

44

45

46

47

48

49

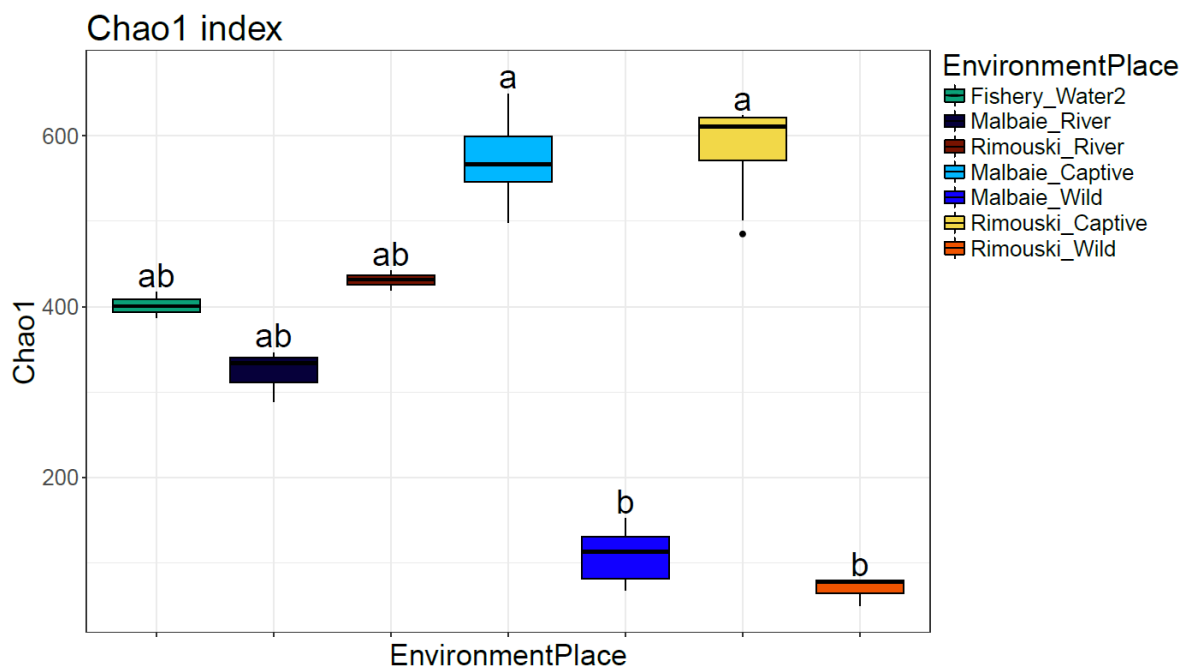

50

51 **Fig. 2** Alpha diversity of environment water and gut microbiota represented with Chao1 diversity  
 52 index.

53

54

55

56

57

58

59

60

61

62

63

64

65

66

67

68

69

70

71

72

73

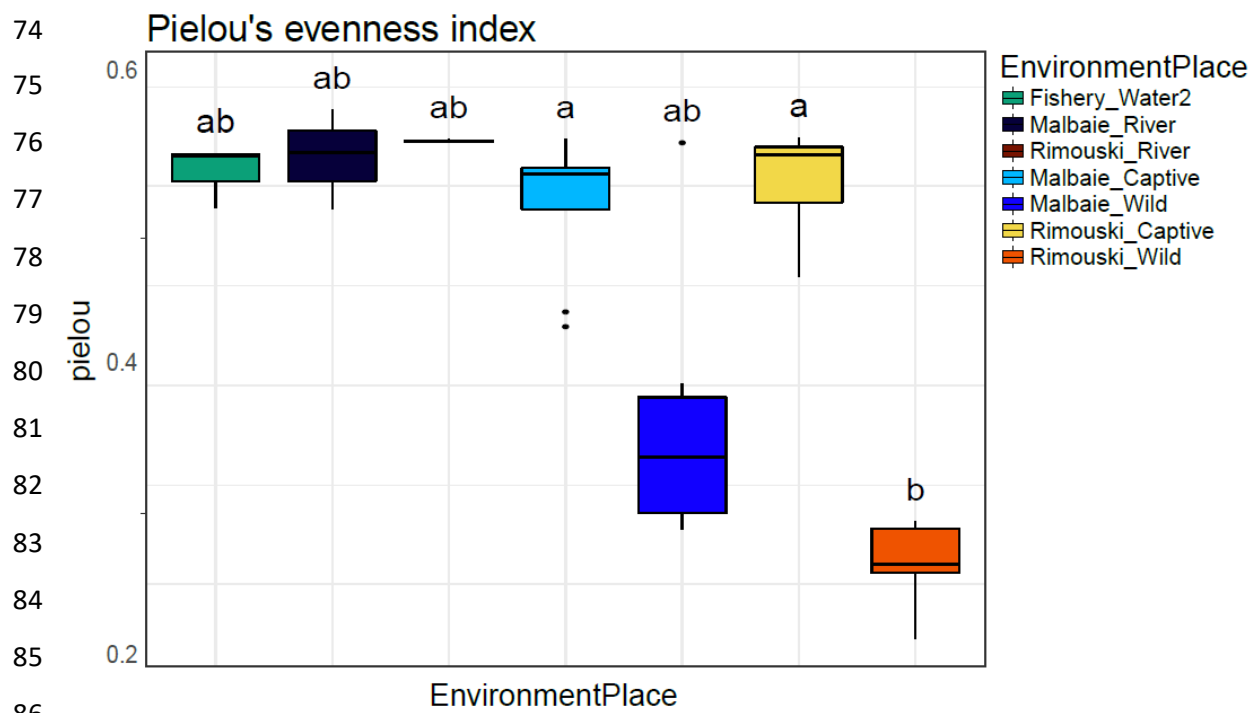

87 **Fig. 4** Alpha diversity of environment water and gut microbiota represented with Pielou's evenness  
 88 index.

89

90

91

92

93

94

95

96

97

98

99

100

101

102

103

104

105

106

107  
 108  
 109  
 110  
 111  
 112  
 113  
 114  
 115  
 116  
 117  
 118  
 119  
 120  
 121  
 122  
 123  
 124  
 125  
 126  
 127  
 128  
 129  
 130  
 131  
 132  
 133  
 134  
 135  
 136

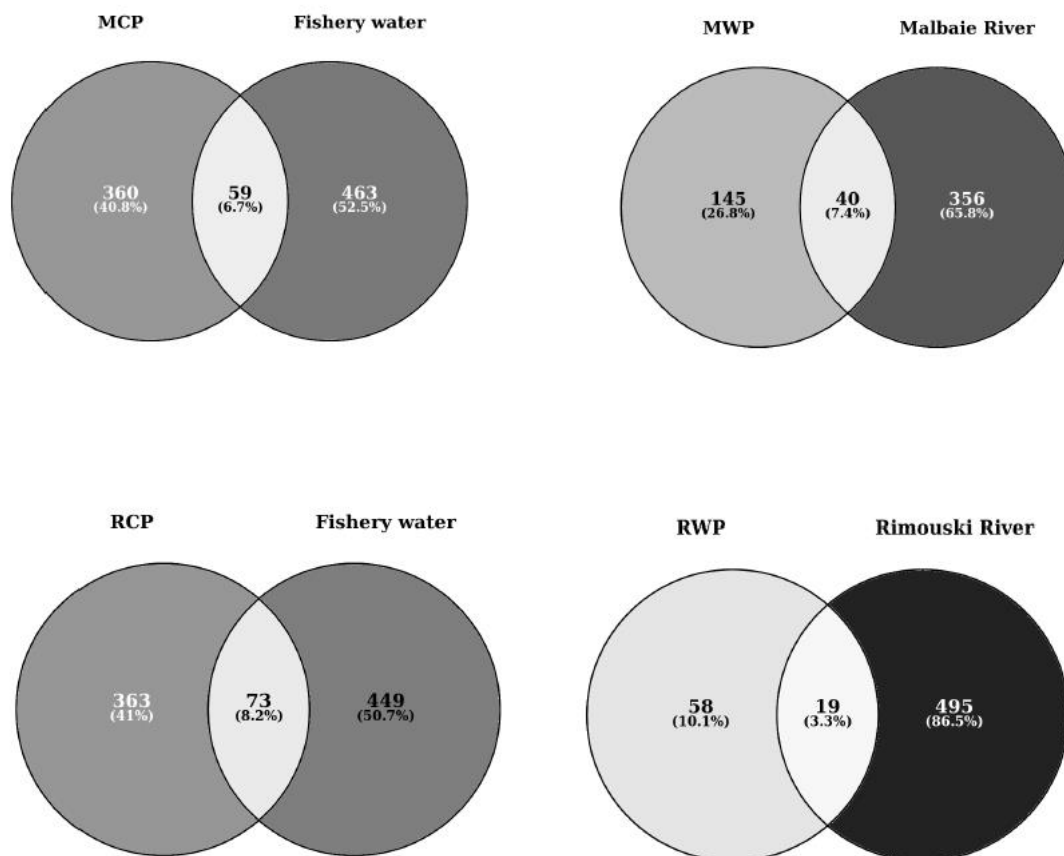

**Fig. 4** Venn diagram showing the percentage of shared OTUs between gut and environmental microbial communities. MCP; Malbaie captive parrs, MWP; Malbaie wild parrs, RCP; Rimouski captive parrs, RWP; Rimouski wild parrs.
